# Supplementary material
Source: publisher site journal article supplement (https://www.dovepress.com/get_supplementary_file.php?f=300399.docx)
Supplement: Supplementary file 1 [file get_supplementary_file.php]

Supplementary files doc.

S1: Informed Consent statements

**Study Title**: - Determining AF size and associated factors among term neonate on the first day of life born at Jimma University Medical Center (JUMC), southwest Ethiopia.

**Study center**: JUMC

I having been explained that the study is entitled “Determining AF size and associated factors among term neonate on the first day of life born at JUMC southwest Ethiopia”. I have been informed that the purpose of this study is to determine mean anterior fontanel size and associated factors of term neonate on first day of life born at JUMC, southwest Ethiopia. I understood that participation in this study does not involve risks to me or my neonate. I also adequately explained that all infection prevention mechanism will be used during performing measurement and my baby wrapped well by towel to prevent from hypothermia (cold while taking measurement). I have told that only light palpation will be done and the procedure is non-invasive, so that no fear of distortion of my baby’s head or other harm. Procedure, risks and benefit of participation in the study in general is well understood; I have also kindly requested to allow photo of my baby at only site of fontanel measurement and told me used for educational purpose only here by agree to participate in the study. I understand that my participation is voluntary and I am free to with draw at any time. I understood that Merga Sheleme is the contact person if I have questions about the study or about my rights as a study participant. Do you have any concern?

Can I proceed? 1. Yes 2. No If yes, proceed if no, stop! Thanks for your response.

------------------------- ---------------- -------------------------- --------------

Signature of participant date signature of data collector date

In case of any concern about the study, you can contact me by the following address.

Contact person: Merga Sheleme

Phone number**: +251920963059.**

Gmail address**:** [**mergasheleme2014@gmail.com**](mailto:mergasheleme2014@gmail.com)

**S2: Written consent form and Ethical clearance**

**(for those able to read and write)**

I have read and understood well the condition stated above and I can withdraw from the study at any time and I understand that there is no risk on being participate and the participation is fee to out. Therefore, I am willing to participate in the study.

Signature___________________ Date____________ 2011E.C

**Thank you**!

Time at the end of the interview __________

data collector name & Signature ___________

**S3: Questionaries**

**MRN** of mother**--------------** Questionnaire ID ____________ study site­­­­­­­­­­ **JUMC**

| Part I: Socio-demographic information of the mother |
| --- |

| | 1. Maternal age (in years) |  | | --- | --- | | 1. Place of residence | 1 Urban 2 Rural | | 1. Ethnicity | 1. Oromo 2. Amara 3. Tigre 4. Hadiya | | 5. Dawuro 6. Others specify……… | | 1. Marital status | 1. Married 2. Single 3. Divorce 4. Widowed | | 5. Other specify | | 1. Educational status | 1.unable to read and write 2. Only able to read and write | | 3. Primary school 4. High school 5. College | | 6. Degree and above | | 1. Occupation of the mother | 1. House wife 2. Governments employ | | 3. Merchant 4. Daily laborer 5. Farmer 6. Student | | 7. Other specify------------------ | | 1. Monthly income of family | 1.≤600 2. 601-1650 3. 1651-3200 | | 4. 3201-5250 5. ≥5251 6. No income |  | Part II: Condition during labor and pregnancy | | | --- | --- | | 1. Number of pregnancies | ------------- | | 1. Onset of labour | 1. Spontaneous 2. Induced | | 1. Duration of labour (in hours) |  | | 1. Mode of deliveries | 1. Spontaneous vaginal delivery (SVD) | | 5. Gestational age (weeks) |  | |
| --- | --- | --- | --- | --- | --- | --- | --- | --- | --- | --- | --- | --- | --- | --- | --- | --- | --- | --- | --- | --- | --- | --- | --- | --- | --- | --- | --- | --- | --- | --- | --- | --- | --- |
| | Part III: Newborn related variables | | | --- | --- | | 1. Age of neonate (hours) |  | | 1. Gender | 1. Male 2. Female | | 1. Birth weight (kg) |  | | 1. Head circumference (cm) |  | | 1. AF size | 1. AP diameter------------------- | |  | 2.Transverse diameter--------------- | | 1. Crown heel length (cm) |  | |

- About AF

First mark of AF

--------------------------------------------------------

Second mark of AF

----------------------------------------------------------

Name of data collector--------------------------------------------Time------------
